# Supplementary material for: Extinction Risk Assessment and Chemical Composition of Aerial Parts Essential Oils from Two Endangered Endemic Malagasy Salvia Species
Source: MDPI journal article supplement (doi:10.3390/plants12101967), 2023-05-12
Supplement: s1 [file s1]

# Extinction Risk Assessment and Chemical Composition of Aerial Parts Essential Oils from Two Endangered Endemic Malagasy *Salvia* Species

Stéphan R. Rakotonandrasana<sup>1</sup>, Mathieu Paoli<sup>2</sup>, Mamy J. Randrianirina<sup>3</sup>, Harilala Ihandriharison<sup>3</sup>, Marc Gibernau<sup>2</sup>, Ange Bighelli<sup>2</sup>, Marrino F. Rakotoarisoa<sup>1</sup>, Pierre Tomi<sup>2</sup>, Charles Andrianjara<sup>3</sup>, Félix Tomi<sup>2,\*</sup> and Delphin J. R. Rabehaja<sup>3</sup>

<sup>1</sup> Department of Ethnobotany and Botany, National Center for Applied Pharmaceutical Research, 101 Antananarivo, Madagascar; stephanandrasana@gmail.com (S.R.R.); rino2r@hotmail.fr (M.F.R)

<sup>2</sup> Laboratoire Sciences pour l'Environnement, Université de Corse-CNRS, UMR 6134 SPE, Route des Sanguinaires, 20000 Ajaccio, France; paoli\_m@univ-corse.fr (M.P.); gibernau\_m@univ-corse.fr (M.G.), bigHELLI\_a@univ-corse.fr (A.B.), tomi\_p@univ-corse.fr (P.T.) ; tomi\_f@univ-corse.fr (F.T.)

<sup>3</sup> Institut Malgache de Recherches Appliquées (IMRA), Département Phytochimie et Contrôle Qualité, Antananarivo 102, Madagascar ; rabeahaja@yahoo.fr (D.J.R.R.); charles.andrianjara@gmail.com (C.A.); mjrandroidrianirina@gmail.com (M.J.R.); iharilalandr@gmail.com (H.I.)

\* Correspondence: tomi\_f@univ-corse.fr; Tel.: +33-495-52-4122

**Table S1.** Main components of Salvia Essential Oils from East Africa

[illegible]

|                       |      |      |      |     |      |      |      |      |     |      |      |  |
|-----------------------|------|------|------|-----|------|------|------|------|-----|------|------|--|
| β-Cubebene+ β-Elemene | 9.9  |      |      |     |      |      |      |      |     |      |      |  |
| (E)-β-Caryophyllene   | 7.3  | 13.0 | 13.1 | 4.5 | 3.4  | 2.1  | 5.7  | 2.2  | 8.0 | 10.5 | 2.1  |  |
| α-Humulene            |      | 3.8  |      |     |      |      | 4.7  |      | 2.8 | 2.3  |      |  |
| Germacrene D          | 29.0 | 28.5 |      |     |      |      |      |      |     |      |      |  |
| Bicyclogermacrene     | 9.3  | 8.4  |      |     |      |      |      |      |     |      |      |  |
| δ-Cadinene            | 8.7  |      | 2.5  | 6.4 |      |      |      |      |     |      |      |  |
| (E)-Nerolidol         |      |      |      |     | 3.5  | 2.1  | 2.2  |      |     |      |      |  |
| Caryophyllene oxide   |      |      |      |     | 14.6 | 5.6  | 14.3 | 22.6 | 4.9 | 1.3  |      |  |
| Spathulenol           |      |      |      |     | 29.1 | 2.0  | 2.0  | 18.3 | 7.7 | 2.6  |      |  |
| Humulene oxide I      |      |      |      |     |      |      |      | 12.6 |     |      |      |  |
| Viridiflorol          |      |      |      |     | 3.3  | 24.5 | 9.3  |      |     | 5.3  |      |  |
| Ledol                 |      |      |      |     | 6.5  | 6.6  | 5.2  |      |     | 4.6  |      |  |
| Guaiol                |      | 14.0 |      |     |      |      |      |      |     |      |      |  |
| τ-Cadinol             |      |      |      |     | 3.0  | 2.0  | 2.3  |      |     |      |      |  |
| α-Bisabolol           |      |      |      |     |      |      |      | 3.8  |     | 65.5 | 26.1 |  |

Percentage of reported components ≥ 5%

*Sae* = *Salvia aethiopis*; *Sni* = *S. nilotica*; *Ssc* = *S. schimperi*; *Sdo* = *S. dolomitica*; *Sso* = *S. somaliensis*; *Sac* = *S. africana-caerulea*; *Sal* = *S. africana-lutea*; *Sab* = *S. albicaulis*; *S. chamelaegnea*; *Sdo* = *S. dolomitica*; *Sla* = *S. lanceolata*; *Smu* = *S. muirii*; *Sra* = *S. radula*; *Sre* = *S. repens*; *Sru* = *S. runcinata*; *Sst* = *S. stenophylla*.

## References

- Güllüce, M.; Özer, H.; Barış, Ö.; Dafedera, D.; Şahin, F.; Polissiou, M. Chemical composition of the essential oil of *S. aethiopis* L. *Turk J. Biol.* **2006**, *30*(4), 231-235.
- Ashafa, H.; Asres, K.; Mazumder, A.; Bucar A. Leaf essential oil of *S. nilotica* and *S. schimperi*: their antimicrobial and antioxidant activities. *Ethiop. Pharm. J.* **2008**, *26*, 49-58.
- Ebani, V.V.; Nardoni, S.; Bertelloni, F.; Giovanelli, S.; Ruffoni, B.; D'Ascenzi, C.; Pistelli, L.; Mancianti, F. Activity of *S. dolomitica* and *S. somaliensis* essential oils against bacteria, molds and yeasts. *Molecules.* **2018**, *3*, 396.
- Kamatou, G.P.P.; Van Zyl, R. L.; Van Vuuren, S.F.; Viljoen, A.M.; Figueiredo, A.C.; Barroso, J.G., Pedro, L.G. Biological activities and composition of *Salvia muirii* L. Bol. Essential oil. *J. Essent. Oil Res.* **2006**, *18*, 48-51.
- Kamatou, G.P.P.; Van Zyl, R. L.; Van Vuuren, S.F.; Viljoen, A.M.; Figueiredo, A.C.; Barroso, J.G., Pedro, L.G.; Tilney P.M. *J. Essent. Oil Res.* **2006**, *18*, 72-79.
- Kamatou, G.P.P. Indigenous *Salvia* species – An investigation of their pharmacological activities and phytochemistry. Thesis, Doctor of Philosophy, University of the Witwatersrand, Johannesburg, 2006.
